# Supplementary material for: Synthesis, characterization, and cancer cell-selective cytotoxicity of mixed-ligand cobalt(iii) complexes of 8-hydroxyquinolines and phenanthroline bases
Source: Royal Society of Chemistry journal article supplement (doi:10.1039/d3dt04045c), 2024-01-01
Supplement: d3dt04045c1.pdf [file d3dt04045c1.pdf]

## Electronic Supporting Information (ESI†)

for

### Synthesis, characterization, and cancer cell-selective cytotoxicity of mixed-ligand cobalt(III) complexes of 8-hydroxyquinolines and phenanthroline bases

Banashree Deka,<sup>a‡</sup> Tukki Sarkar,<sup>a‡,§</sup> Arnab Bhattacharyya,<sup>b</sup> Ray J. Butcher,<sup>\*c</sup> Samya Banerjee,<sup>\*d</sup> Sasanka Deka,<sup>e</sup> Kandarpa K. Saikia<sup>\*f</sup> and Akhtar Hussain<sup>\*a</sup>

<sup>a</sup> Department of Chemistry, Handique Girls' College, Guwahati 781001, Assam, India. E-mail: [akhtariisc@gmail.com](mailto:akhtariisc@gmail.com)

<sup>b</sup> Department of Inorganic and Physical Chemistry, Indian Institute of Science, Bangalore 560 012, Karnataka, India.

<sup>c</sup> Department of Chemistry, Howard University, 525 College Street NW 20059, USA. E-mail: [rbutcher99@yahoo.com](mailto:rbutcher99@yahoo.com)

<sup>d</sup> Department of Chemistry, Indian Institute of Technology (BHU), Varanasi, UP 221005, India. E-mail: [samya.chy@itbhu.ac.in](mailto:samya.chy@itbhu.ac.in)

<sup>e</sup> Department of Chemistry, University of Delhi, New Delhi 110024, India. E-mail: [ssdeka@gmail.com](mailto:ssdeka@gmail.com)

<sup>f</sup> Department of Bioengineering and Technology, GUIST, Gauhati University, Guwahati 781014, Assam, India. E-mail: [kksaikia@gmail.com](mailto:kksaikia@gmail.com)

<sup>‡</sup> These authors contributed equally to the work.

<sup>§</sup> Present address; Department of Fluoro-Agrochemicals, CSIR-Indian Institute of Chemical Technology, Hyderabad 500007, Telangana, India.

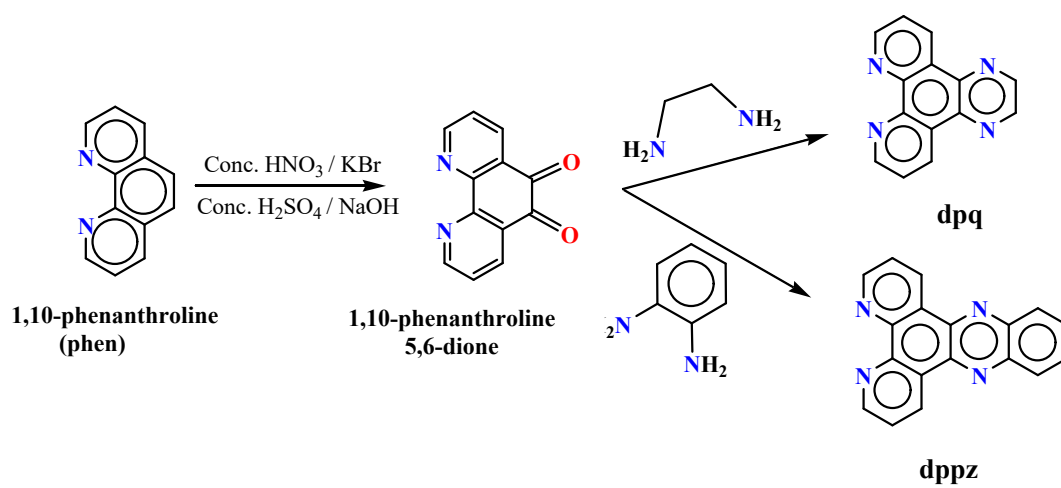

**Scheme S1.** Schematic representation showing the synthetic route to dpq and dppz ligands.

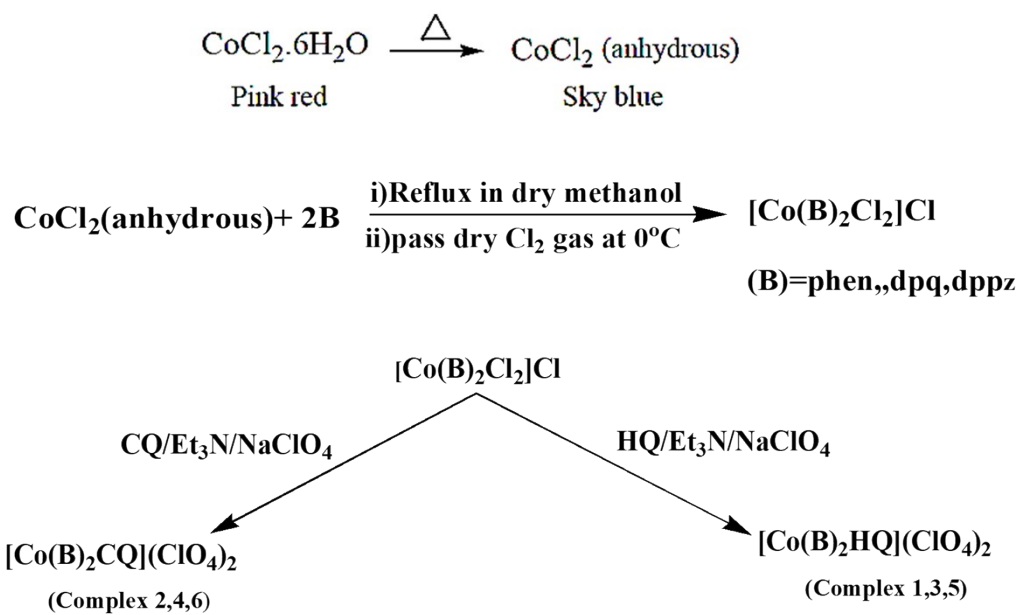

**Scheme S2.** A generalized reaction scheme showing the synthesis of complexes 1–6.

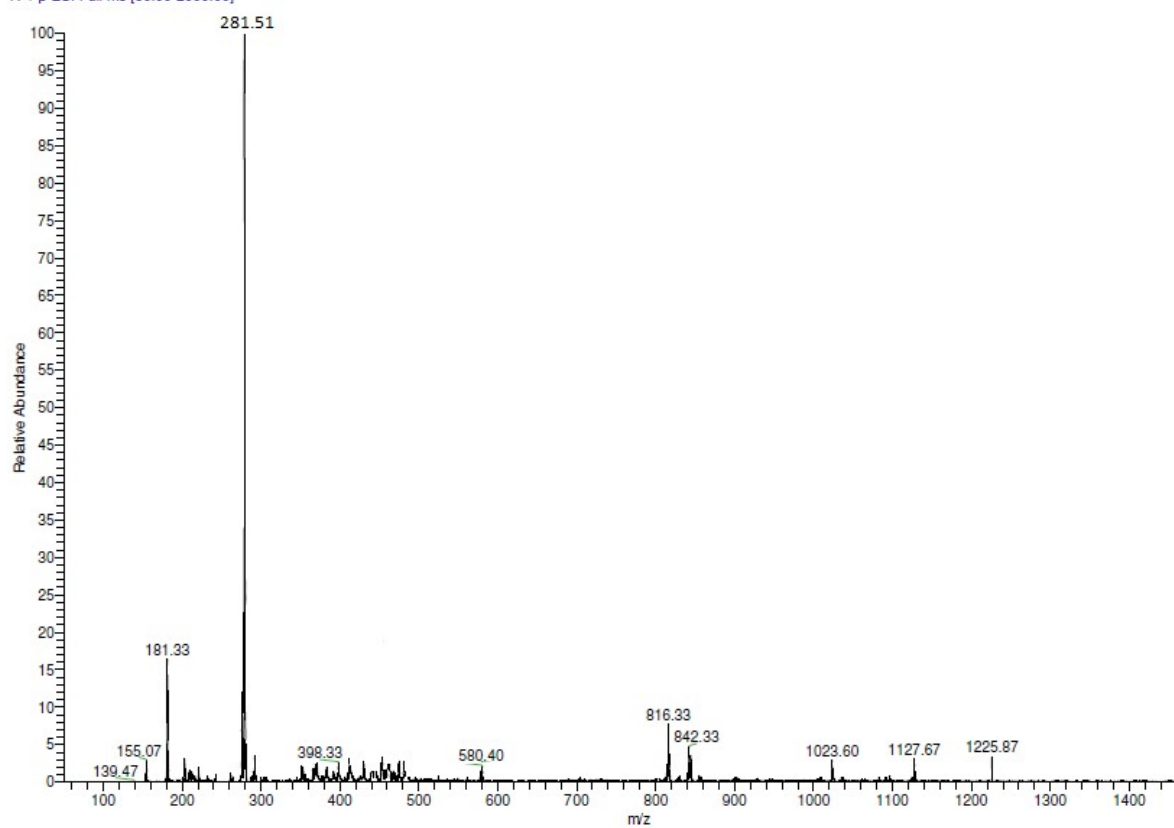

**Fig. S1.** The ESI-MS spectrum of  $[\text{Co}(\text{phen})_2(\text{HQ})](\text{ClO}_4)_2$  (**1**) in 10% aqueous MeOH/MeCN (1:1 ratio) showing the  $[\text{M}-2(\text{ClO}_4^-)]^{2+}$  peak.

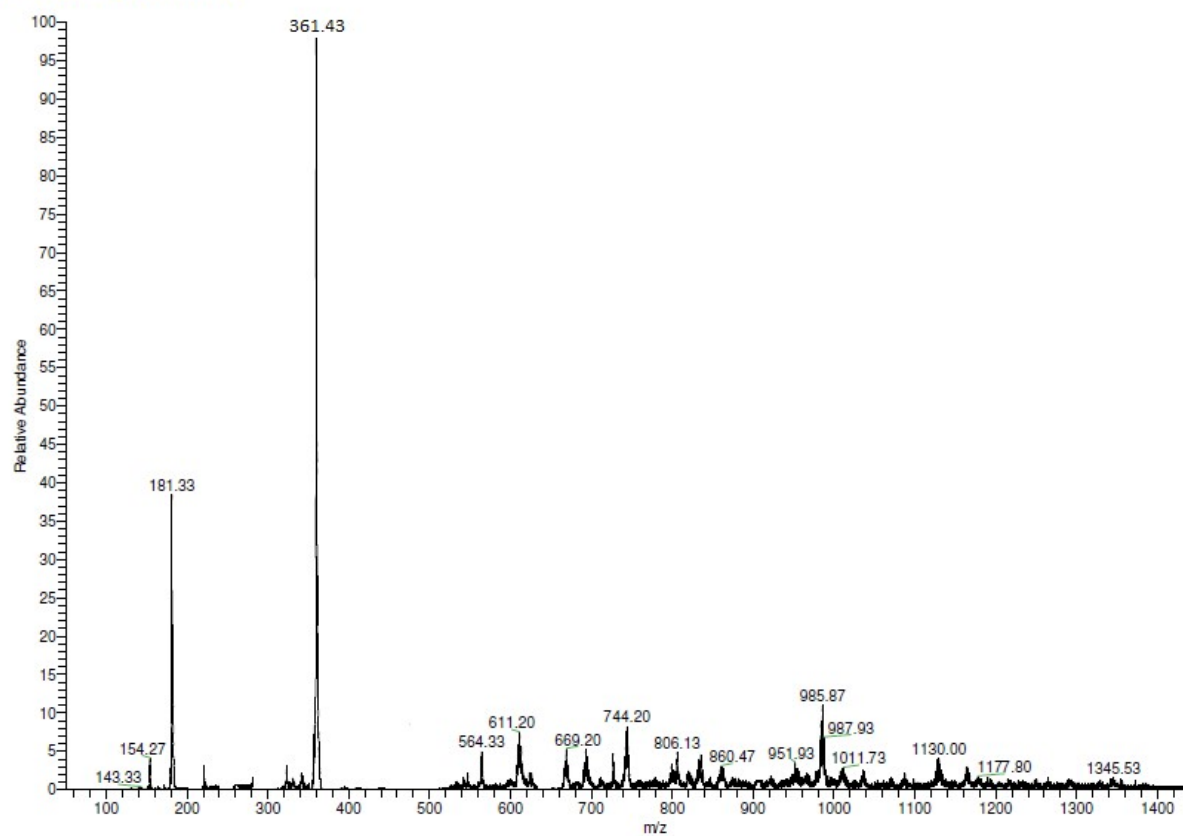

**Fig. S2.** The ESI-MS spectrum of  $[\text{Co}(\text{phen})_2(\text{CQ})](\text{ClO}_4)_2$  (**2**) in 10% aqueous MeOH/MeCN (1:1 ratio) showing the  $[\text{M}-2(\text{ClO}_4^-)]^{2+}$  peak.

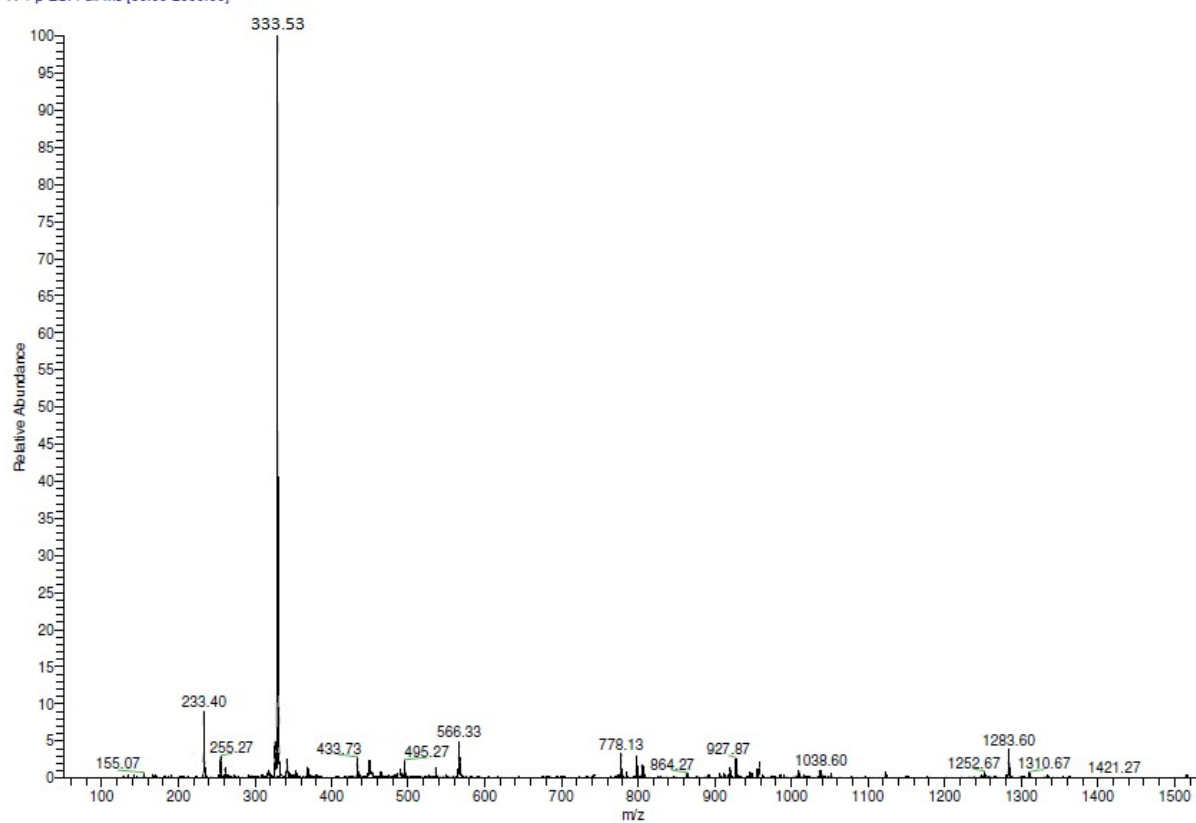

**Fig. S3.** The ESI-MS spectrum of  $[\text{Co}(\text{dpq})_2(\text{HQ})](\text{ClO}_4)_2$  (**3**) in 10% aqueous MeOH/MeCN (1:1 ratio) showing the  $[\text{M}-2(\text{ClO}_4^-)]^{2+}$  peak.

Diluted in MeOH  
T: + p ESI Full ms [50.00-2000.00]

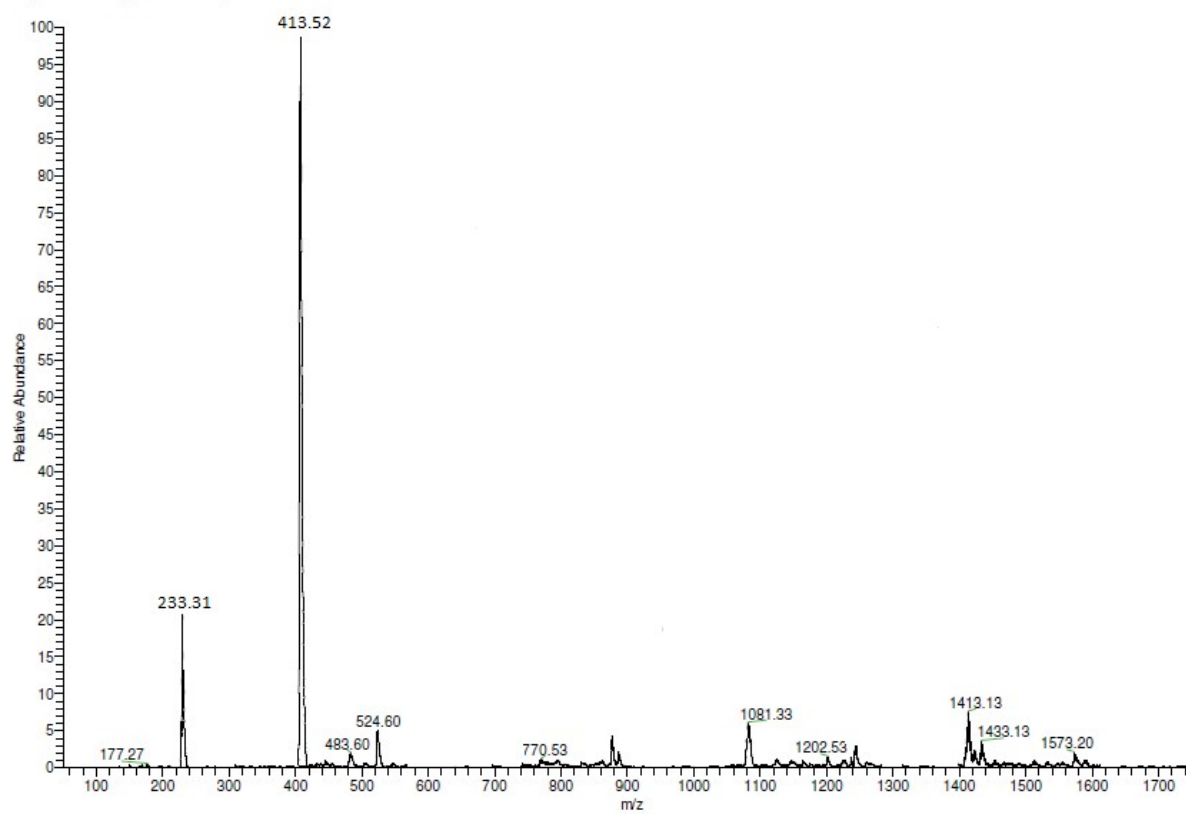

**Fig. S4.** The ESI-MS spectrum of  $[\text{Co}(\text{dpq})_2(\text{CQ})](\text{ClO}_4)_2$  (**4**) in 10% aqueous methanol showing the  $[\text{M}-2(\text{ClO}_4^-)]^{2+}$  peak.

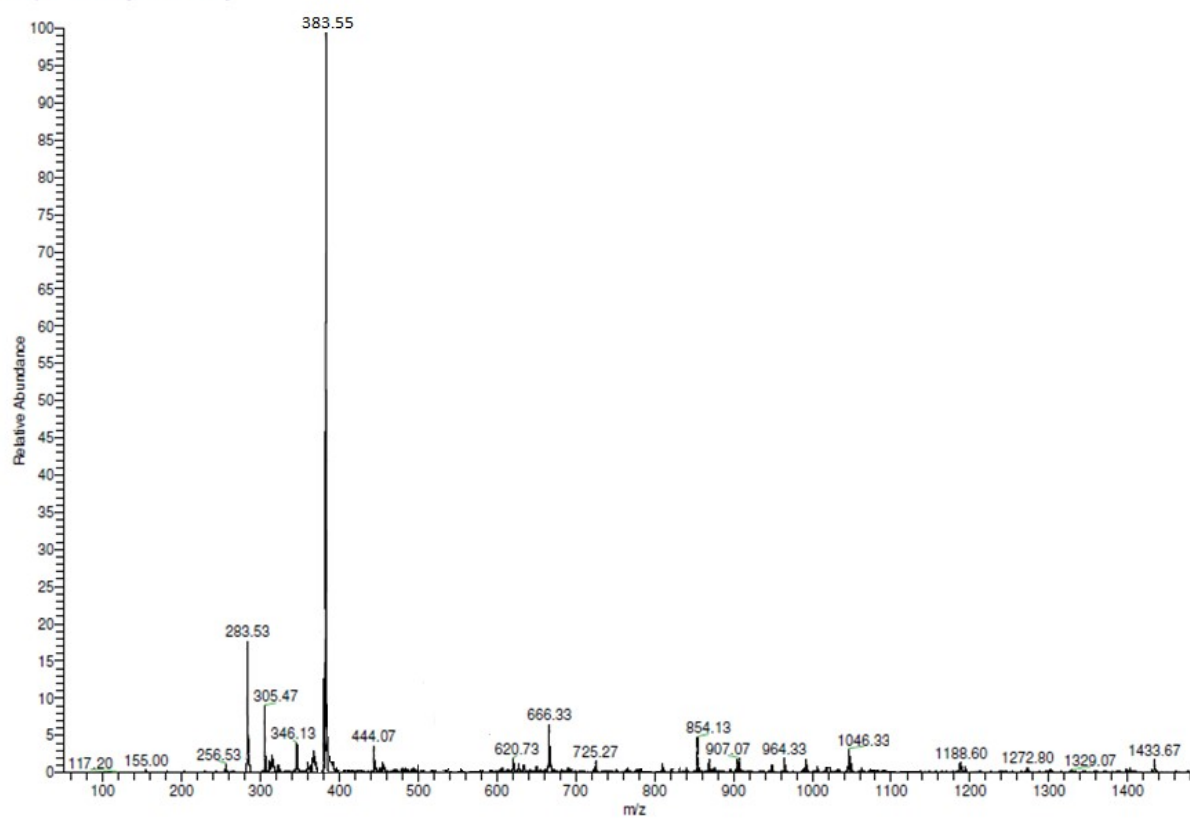

**Fig. S5.** The ESI-MS spectrum of  $[\text{Co}(\text{dppz})_2(\text{HQ})](\text{ClO}_4)_2$  (**5**) in 10% aqueous MeOH/MeCN (1:1 ratio) showing the  $[\text{M}-2(\text{ClO}_4^-)]^{2+}$  peak.



Diluted in ACN

T: + p ESI Full ms [50.00-2000.00]

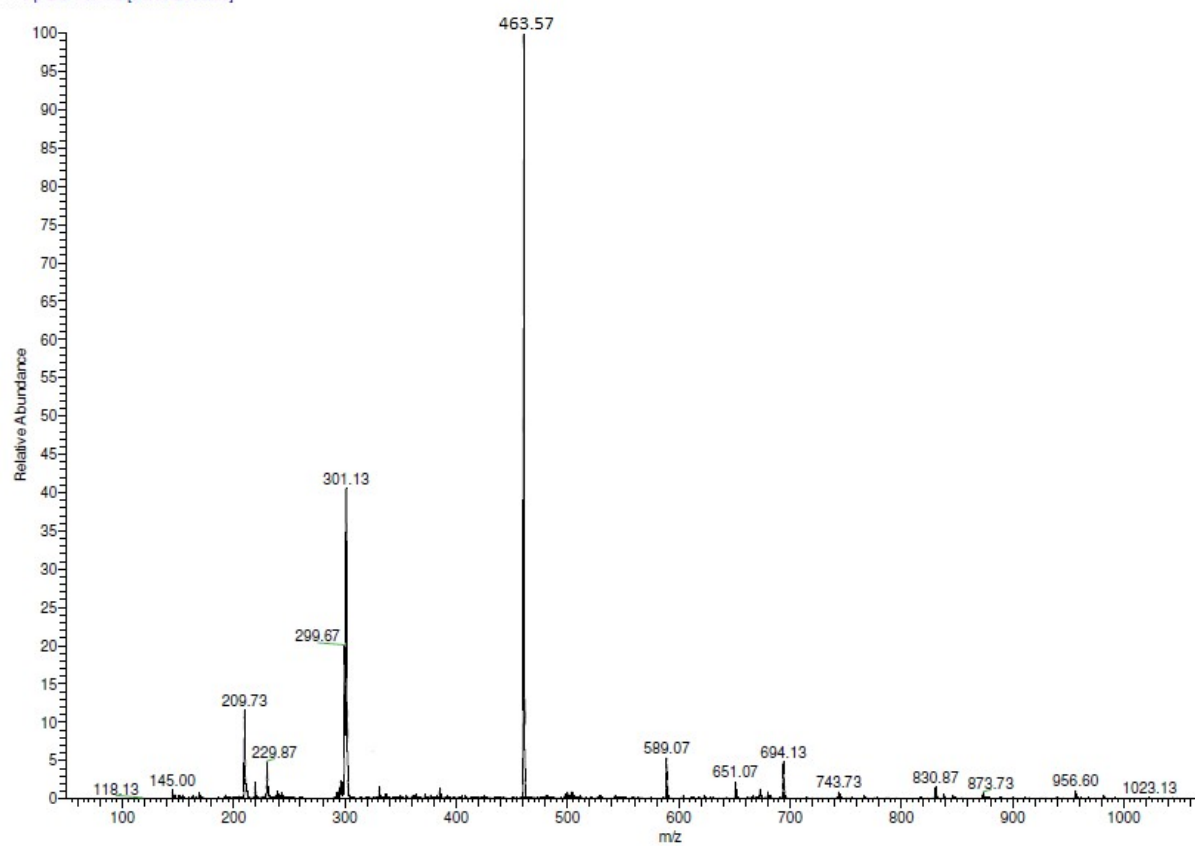

**Fig. S6.** The ESI-MS spectrum of  $[\text{Co}(\text{dppz})_2(\text{CQ})](\text{ClO}_4)_2$  (**6**) in 10% aqueous MeCN showing the  $[\text{M}-2(\text{ClO}_4^-)]^{2+}$  peak.

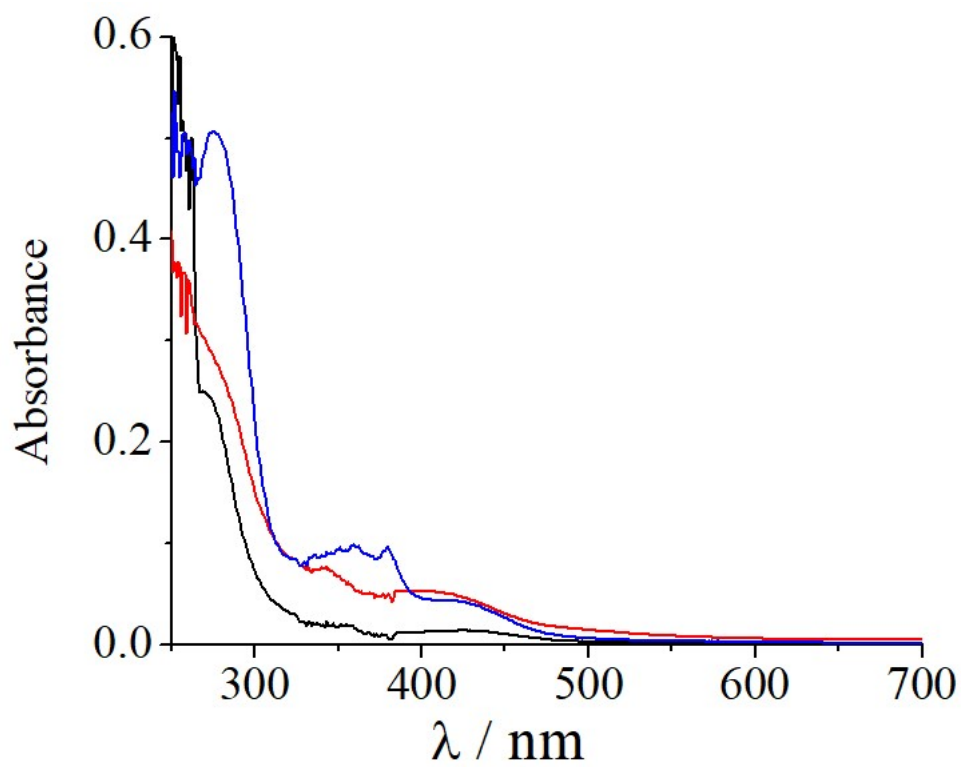

**Fig. S7.** The electronic absorption spectra of complexes **1** (black), **3** (red), and **5** (blue) in DMF/PBS [1:9 (v/v), pH = 7.2).

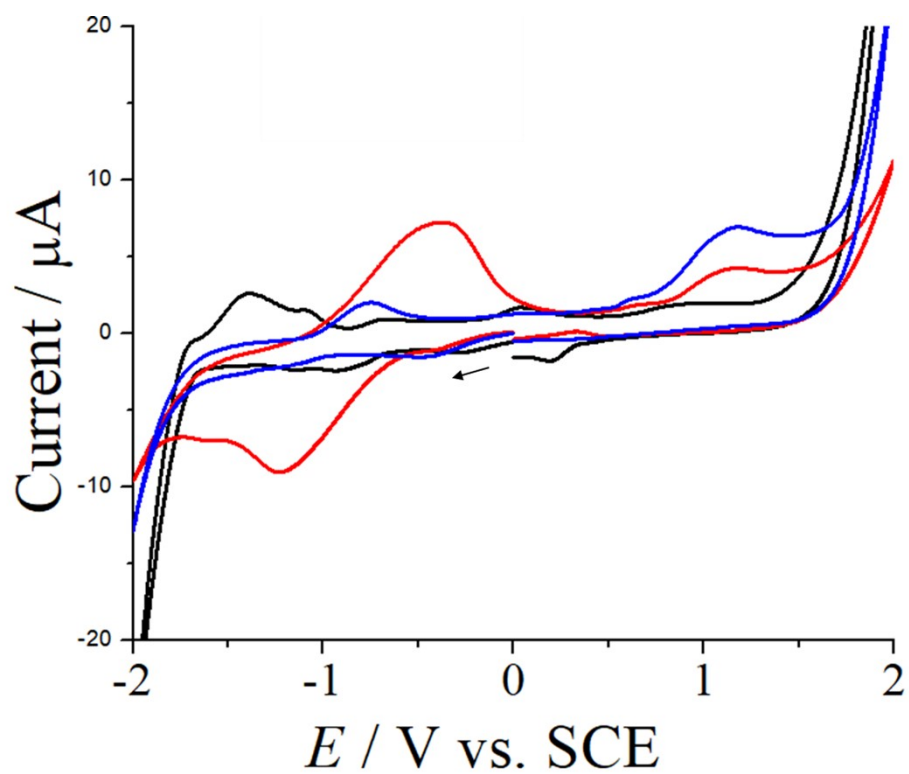

**Fig. S8.** The cyclic voltammograms of complexes **1** (blue), **3** (red), and **5** (black) measured in 5:1 (v/v) DMF/PBS (0.1 M TBAP) showing the cathodic and anodic peaks.

**Table S1.** Cyclic voltametric data for complexes **1–6** (V. vs. SCE, 0.1 M TBAP) showing the cathodic and anodic peaks.

| Complex  | $E_{pc1}$ | $E_{pc2}$ | $E_{pc3}$ | $E_{pa1}$ | $E_{pa2}$ | $E_{pa3}$ | $E_{pa4}$ |
|----------|-----------|-----------|-----------|-----------|-----------|-----------|-----------|
| <b>1</b> | -0.44     | -         | -         |           | 1.16      | -         | -         |
| <b>2</b> | -0.93     | -         | -         | -0.72     | -1.40     | -         | -         |
| <b>3</b> | -1.22     | -         | -         | -         | -0.35     | 1.17      | -         |
| <b>4</b> | -1.57     | -0.83     | -0.26     | -1.46     | -0.72     | -         | 0.35      |
| <b>5</b> | -0.90     | -0.20     | 0.20      | -0.70     | 0.30      | -         | -1.40     |
| <b>6</b> | -0.93     | -0.24     | -         | -0.70     | -         | -1.45     | 0.32      |

Note:  $E_{pc1}$  and  $E_{pa2}$ ,  $E_{pc2}$  and  $E_{pa2}$ ,  $E_{pc3}$  and  $E_{pa3}$  are the corresponding counterparts of cathodic and anodic peaks. Cathodic and anodic peaks with no counterparts are written in separate columns in the table.

**Table S2.** Selected crystallographic data and structure refinement parameters for the complexes **1a** and **2a**.acetone.

| Empirical formula                                                                                                     | C <sub>33</sub> H <sub>22</sub> N <sub>5</sub> OF <sub>12</sub> P <sub>2</sub> Co | C <sub>33</sub> H <sub>25</sub> N <sub>5</sub> OF <sub>12</sub> P <sub>2</sub> ClCo |
|-----------------------------------------------------------------------------------------------------------------------|-----------------------------------------------------------------------------------|-------------------------------------------------------------------------------------|
|                                                                                                                       | ( <b>1a</b> )                                                                     | ( <b>2a</b> .acetone)                                                               |
| Formula weight (gmol <sup>-1</sup> )                                                                                  | 853.42                                                                            | 1018.80                                                                             |
| Crystal system                                                                                                        | Monoclinic                                                                        | Monoclinic                                                                          |
| Space group                                                                                                           | <i>P21/n</i>                                                                      | <i>P21/c</i>                                                                        |
| <i>a</i> (Å)                                                                                                          | 10.542(2)                                                                         | 13.3417(5)                                                                          |
| <i>b</i> (Å)                                                                                                          | 18.441(4)                                                                         | 17.9204(7)                                                                          |
| <i>c</i> (Å)                                                                                                          | 19.009(4)                                                                         | 16.6565(6)                                                                          |
| $\alpha$ (°)                                                                                                          | 90.000                                                                            | 90.000                                                                              |
| $\beta$ (°)                                                                                                           | 90.05(3)                                                                          | 92.157(2)                                                                           |
| $\gamma$ (°)                                                                                                          | 90.000                                                                            | 90.000                                                                              |
| <i>V</i> (Å <sup>3</sup> )                                                                                            | 3695.6(13)                                                                        | 3979.6(3)                                                                           |
| <i>Z</i>                                                                                                              | 4                                                                                 | 4                                                                                   |
| <i>T</i> (K)                                                                                                          | 296(2)                                                                            | 296(2)                                                                              |
| $\rho_{\text{calc}}$ (g cm <sup>-3</sup> )                                                                            | 1.534                                                                             | 1.700                                                                               |
| $\lambda$ Å (Mo- <i>K</i> $\alpha$ )                                                                                  | 0.71073                                                                           | 0.71073                                                                             |
| $\mu$ (mm <sup>-1</sup> )                                                                                             | 0.646                                                                             | 1.446                                                                               |
| Data/restraints/parameters                                                                                            | 10800/132/526                                                                     | 11602/0/541                                                                         |
| <i>F</i> (000)                                                                                                        | 1712                                                                              | 2004                                                                                |
| Goodness-of-fit on <i>F</i> <sup>2</sup>                                                                              | 1.057                                                                             | 1.020                                                                               |
| <i>R</i> ( <i>F</i> <sub>o</sub> ) <sup>a</sup> , I>2 $\sigma$ (I) / <i>wR</i> ( <i>F</i> <sub>o</sub> ) <sup>b</sup> | 0.0732/0.2085                                                                     | 0.0747/0.2079                                                                       |
| <i>R</i> (all data)/ <i>wR</i> (all data)                                                                             | 0.1668/0.2576                                                                     | 0.1654/0.2610                                                                       |
| Largest diff. peak and hole (e Å <sup>-3</sup> )                                                                      | 0.663, -0.395                                                                     | -1.036, -1.036                                                                      |

<sup>a</sup>*R* =  $\Sigma||F_o|-|F_c||/\Sigma|F_o|$ . <sup>b</sup>*wR* =  $\{\Sigma[w(F_o^2-F_c^2)^2]/\Sigma[w(F_o^2)]\}^{1/2}$ ;  $w = [\sigma^2(F_o)^2 + (AP)^2 + BP]^{-1}$ , where  $P = (F_o^2 + 2F_c^2)/3$ , A = 0.1307, B = 1.1418 for complex **1a**; A = 0.1345, B = 0.0000 for complex **2a**. acetone.

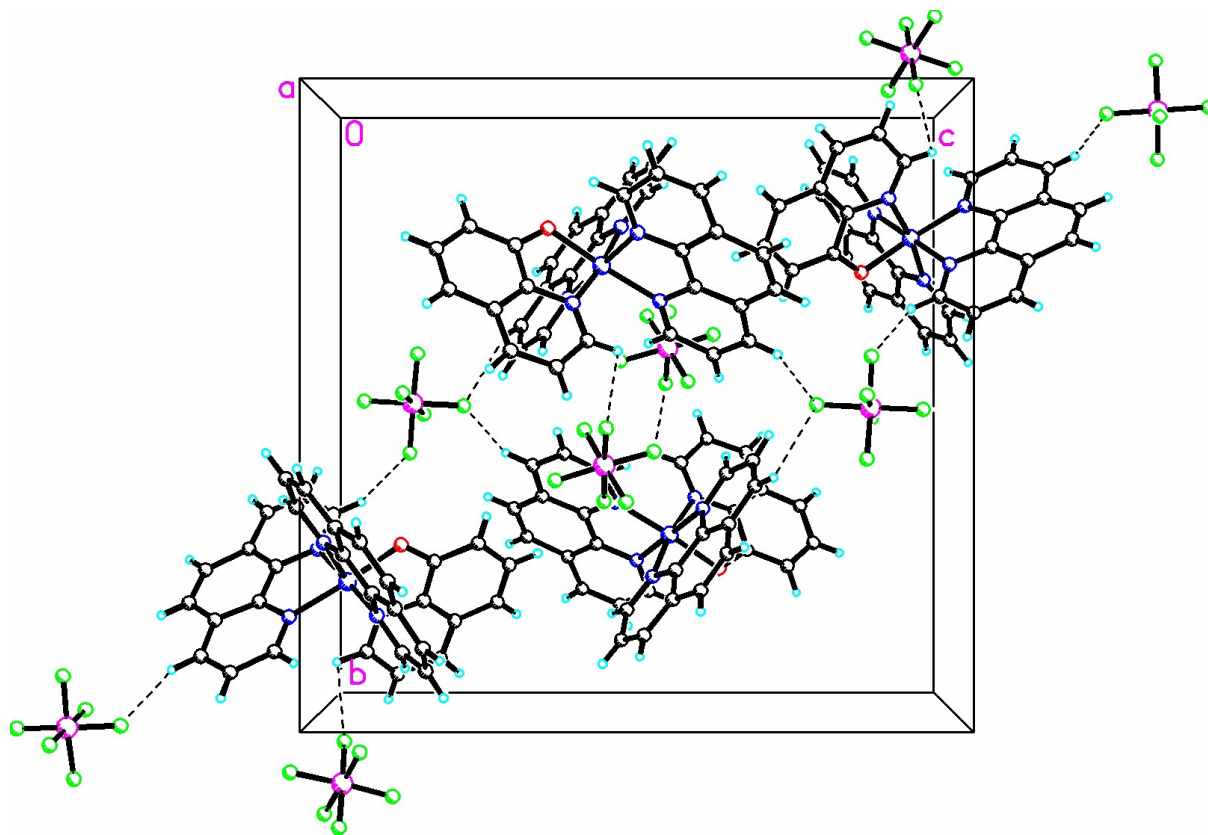

**Fig. S9.** The unit cell packing diagram of  $[\text{Co}(\text{phen})_2(\text{HQ})](\text{PF}_6)_2$  (**1a**). The complex crystallized in the  $P2_1/n$  space group with  $Z = 2$ .

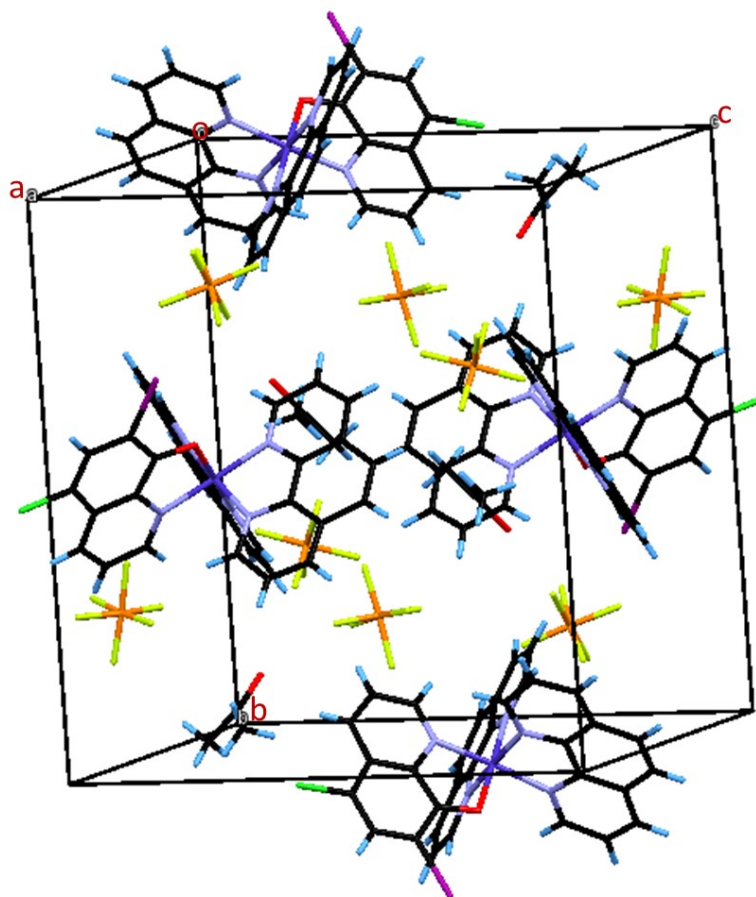

**Fig. S10.** The unit cell packing diagram of  $[\text{Co}(\text{phen})_2(\text{CQ})](\text{PF}_6)_2 \cdot \text{acetone}$  (**2a.acetone**). The complex crystallized in the monoclinic  $P2_1/c$  space group with  $Z = 4$ .

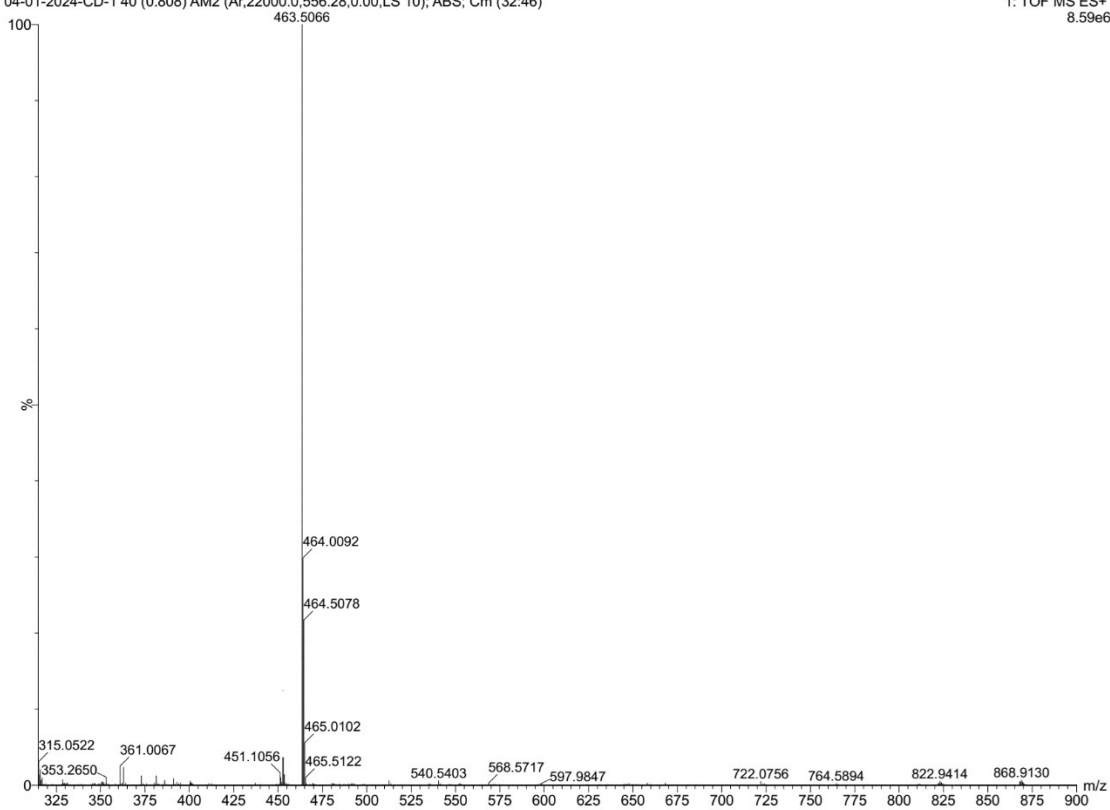

**Fig. S11.** HRMS (TOF MS ES+) spectrum of complex **6** using 10% (v/v) aqueous acetonitrile after 48 hours. The complex retained the molecular ion peak corresponding  $[M-2(\text{ClO}_4)]^{2+}$  at  $m/z$  463.5066.



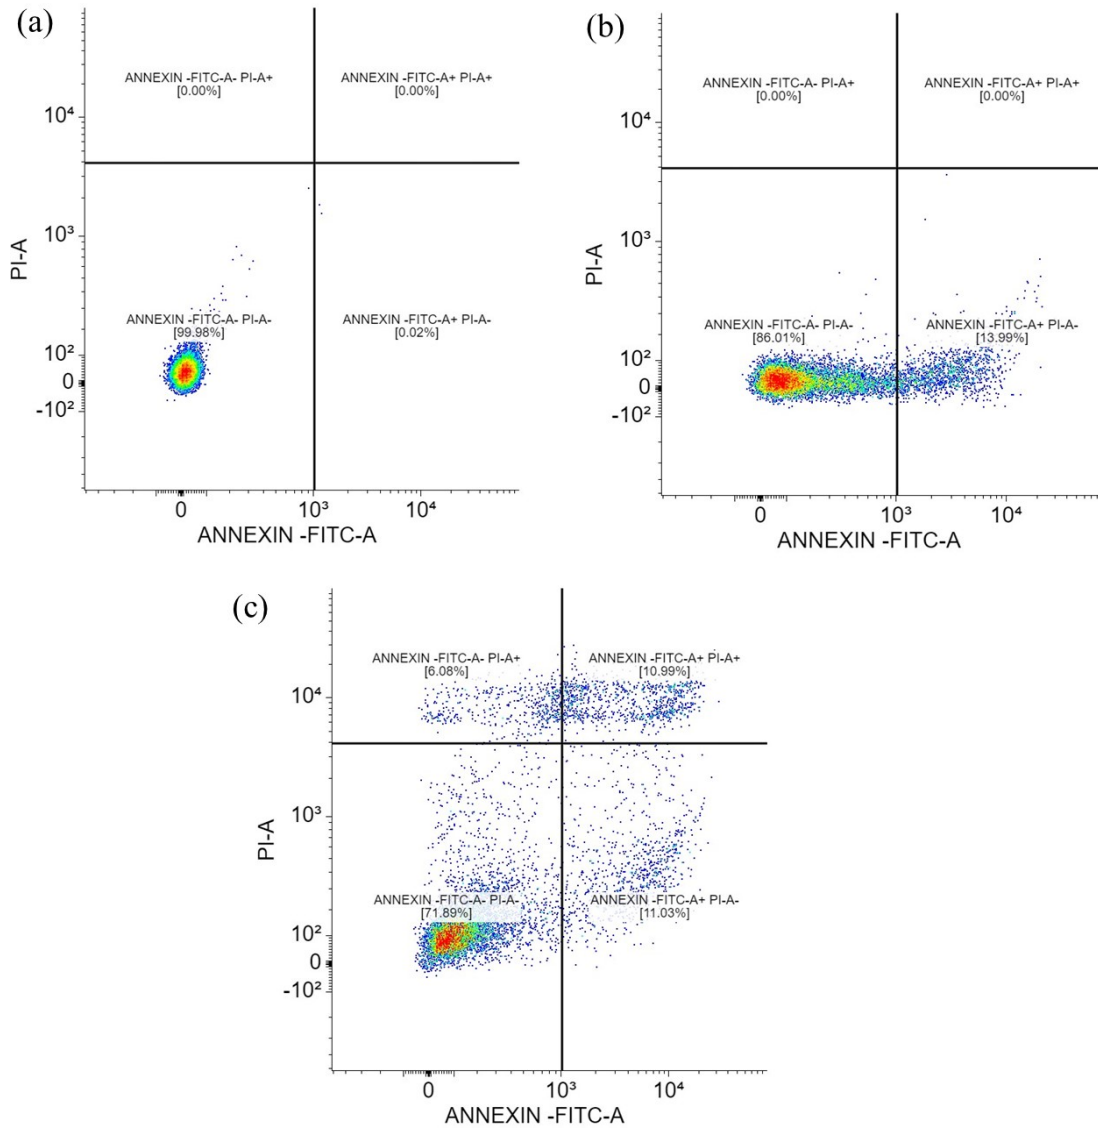

**Fig. S12.** Annexin V-FITC/PI coupled flow cytometric analysis showing various controls with HeLa cells: (a) Cells only; (b) Cells + Annexin-V-FITC only; (c) Cells + Annexin-V-FITC + PI.
